# Supplementary figures and images for: Template-assisted synthesis of CdS nanocrystal arrays in chemically inhomogeneous pores using a vapor–solid mechanism
Source: Royal Society of Chemistry journal article supplement (doi:10.1039/c5ra01175b), 2015-01-01

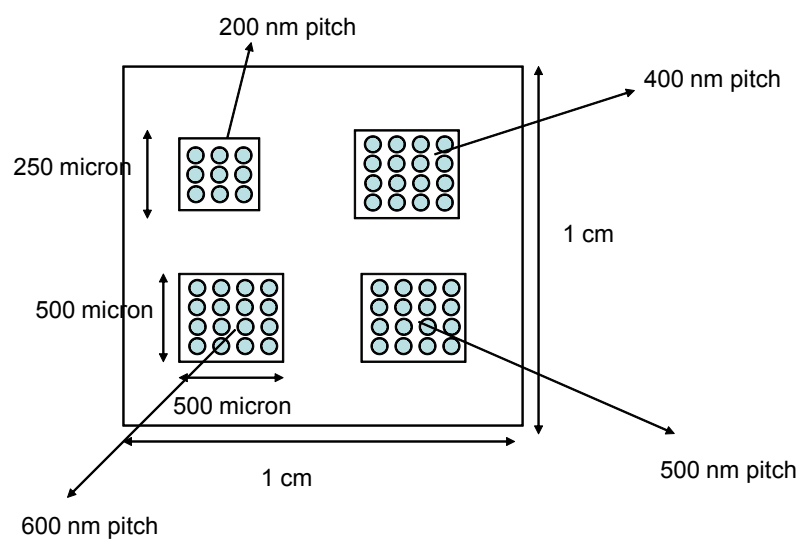

Fig.S1. Scheme of arrangement of the holes on the template. Hole diameter is 80 nm.

Supplement: c5ra01175b1.pdf [file c5ra01175b1.pdf]
